# Supplementary material
Source: PubMed Central journal article supplement (PMC2635427)
Supplement: NIHMS74469-supplement-1.pdf [file NIHMS74469-supplement-1.pdf]

## SUPPLEMENTARY INFORMATION

### **I. Supplementary Figure Legends**

#### **Figure S1. Venus::*UNC-6* expression prior to and during AC invasion.**

**(a-c)** Nomarski images overlaid with Venus::*UNC-6* ( $\Delta$ SP) expression shown in yellow (left), and Venus::*UNC-6* ( $\Delta$ SP) fluorescence alone (right). Venus::*UNC-6* ( $\Delta$ SP) lacks a signal sequence and was thus retained in the cells in which *unc-6* is expressed. Venus::*UNC-6* was retained within the neurons of the ventral nerve cord (VNC, small bracket) under the AC (arrow) prior to invasion at the P6.p 1- and 2-cell stages (large brackets, **a** and **b**), and during the time of invasion at constant levels (**c**). Scale bar in (**a**) is 5 $\mu$ m in this and all subsequent supplementary figures.

**Figure S2. Venus::*UNC-6* expression and localization is not dependent on the vulval cells.** Nomarski image (left), and corresponding fluorescence image (right) of an animal expressing Venus::*UNC-6* at the early L3 stage after laser-mediated ablation of the vulval cells in the early L2 larval stages. Venus::*UNC-6* was expressed normally in the VNC and localized to the basement membrane (arrowhead) under the AC (arrow) as in wild-type animals ( $n = 24/24$  animals). Inset highlights the basement membrane localization of Venus::*UNC-6* (arrowhead) under the AC.

#### **Figure S3. AC-specific expression of *UNC-40::GFP*.**

**(a)** Nomarski image overlaid with *UNC-40::GFP* fluorescence (green). The *unc-40::GFP* construct is driven by the AC-specific regulatory element of the *cdh-3* gene. **(b)** The

corresponding fluorescence image of UNC-40::GFP fluorescence alone. The *cdh-3* AC-specific promoter drives expression solely in the AC (arrow), and not in neighboring cells, including vulval cells (brackets). The asterisk marks autofluorescence from the gut granules.

**Figure S4. The Rac orthologs GFP::MIG-2 and GFP::CED-10 are polarized along the invasive cell membrane of the AC.** (a-e) Nomarski images (left), corresponding fluorescence images (right). Time is post-hatching at 20°C. (a) GFP::MIG-2 expression driven by its endogenous promoter was first expressed in the AC during the late L2 (9.5 hours before invasion) and was not polarized (16/16 animals). (b) MIG-2 was first polarized at the L2 molt (arrowhead; 7/11 animals). (c-e). Polarized MIG-2 was maintained along the invasive cell membrane from the early L3 stage through the time of invasion (20/20 animals for each stage). (f) Projected confocal z-stack showing uterine and vulval expression of GFP::CED-10 driven by its endogenous promoter (left) and the corresponding spectral representation of the fluorescence intensity (right). CED-10 was expressed in all uterine and vulval cells (bracket outlines the 1° VPCs), and was polarized along the basal (invasive) membrane of the AC (arrow) but not in neighboring uterine cells (arrowheads).

**Figure S5. PAR-3::GFP and apical AJM-1::GFP are localized normally in *unc-6* mutants.** (a, b) Nomarski images (left), corresponding fluorescence images (right). (a) PAR-3::GFP was localized to apical and lateral membranes of wild-type ACs prior to invasion (arrowheads), and this polarity was not altered in *unc-6* mutants (b, arrowheads;  $n = 20/20$  animals). (c) In wild-type animals AJM-1::GFP (green) localized to nascent junctions (arrowhead) in the apical region of the AC (expressing *zmp-1*>*mCherry* in magenta). (d) In

*unc-6* mutants apical AJM-1::GFP junctions were formed and positioned normally compared to wild-type animals ( $n \geq 60$  wild-type and *unc-6* animals examined).

**Figure S6. Pan-uterine expression of mCherry:: PLC $\delta^{\text{PH}}$  reveals a unique PI(4,5)P<sub>2</sub> rich invasive membrane domain in the AC.** Fluorescence (left) overlaid on corresponding Normarski image (right). **(a)** Expression of the PI(4,5)P<sub>2</sub> sensor mCherry::PLC $\delta^{\text{PH}}$  in the AC revealed strong polarization at the basal (invasive) cell membrane (arrowhead). **(b)** In contrast, a section lateral to the AC through the neighboring ventral and dorsal uterine cells (VU/DU) expressing PLC $\delta^{\text{PH}}$ ::mCherry, revealed that adjacent uterine cells did not have PI(4,5)P<sub>2</sub> concentrated in basal membranes (arrowheads).

**Figure S7. GFP::MIG-2 is localized normally in the AC of *fos-1(ar105)* animals.**

Nomarski images (left), corresponding fluorescence images (right). In **(a)** wild-type animals and **(b)** *fos-1(ar105)* mutants, MIG-2::GFP was strongly polarized to the invasive cell membrane of the AC (arrowhead;  $n = 20/20$  *fos-1a* mutants examined). **(c)** In *unc-6* animals, MIG-2::GFP polarity was perturbed.

**Video S1. Hemicentin::GFP deposition under the AC in wild-type animals.**

Hemicentin::GFP was localized at low levels along gonadal and ventral epidermal basement membranes, but was deposited at high levels (green, orange arrows) under the AC's invasive cell membrane (expressing *cdh-3*>mCherry::moeABD in magenta) during AC invasion.

Little hemicentin::GFP was deposited along apical or lateral domains of the AC (note small deposit at white arrowhead).

**Video S2. Hemicentin::GFP deposition is perturbed *unc-6* mutants.**

In *unc-6* mutants there was a dramatic decrease in hemicentin deposited under the AC (expressing *cdh-3*>mCherry::moeABD in magenta) at the site of basement membrane contact (green, orange arrows), while apical and lateral accumulations of hemicentin increased (white arrowheads).

## II. Supplementary Figures and Tables

**Figure S1**

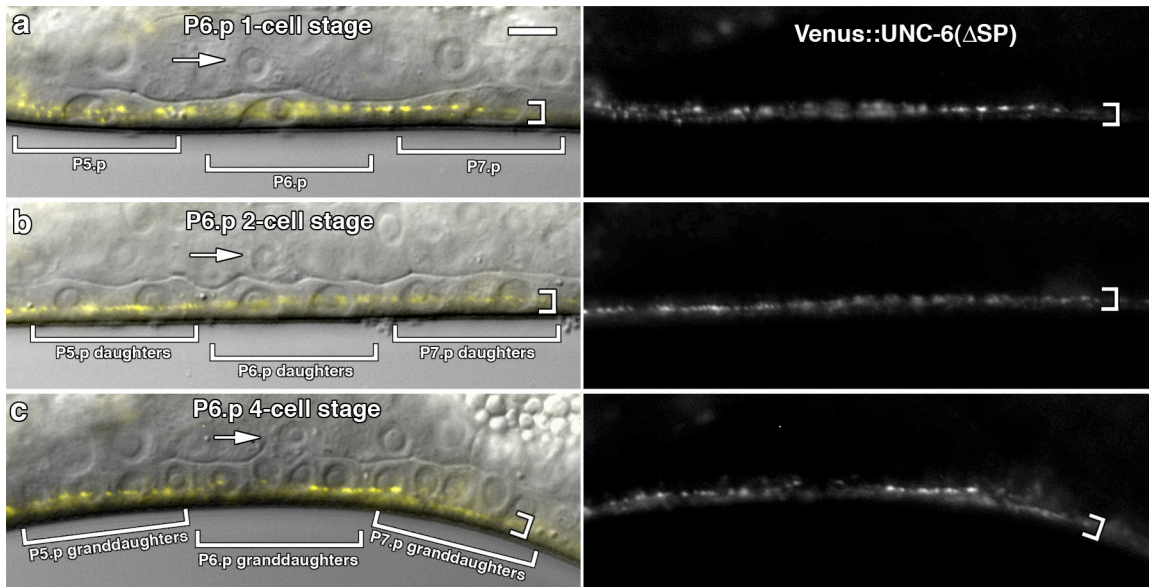

**Figure S2**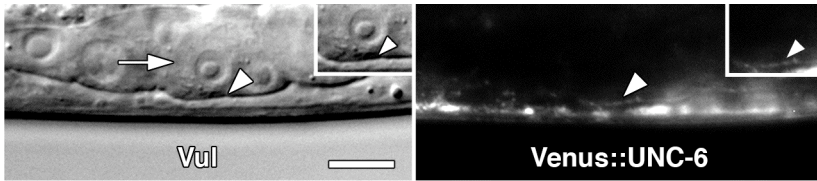

**Figure S3**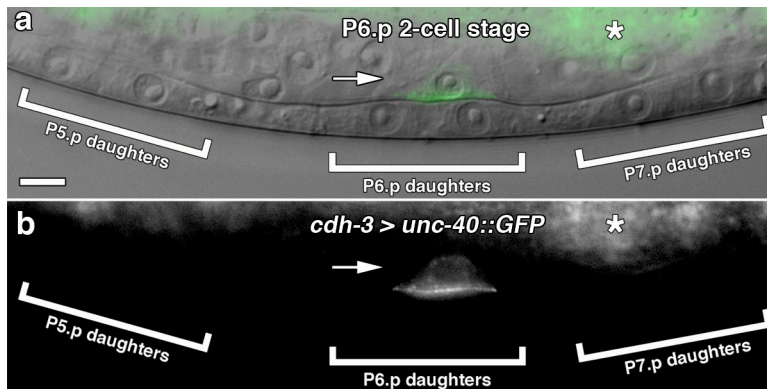

Figure S4

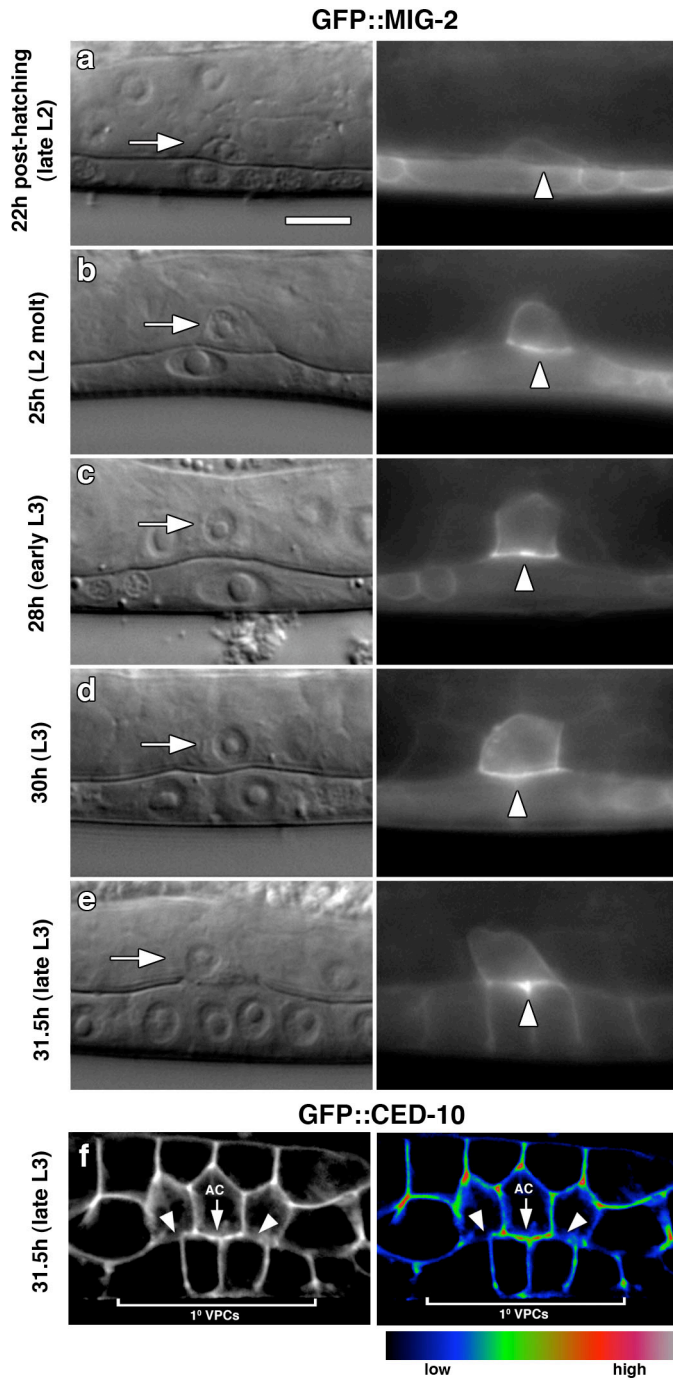



Figure S5

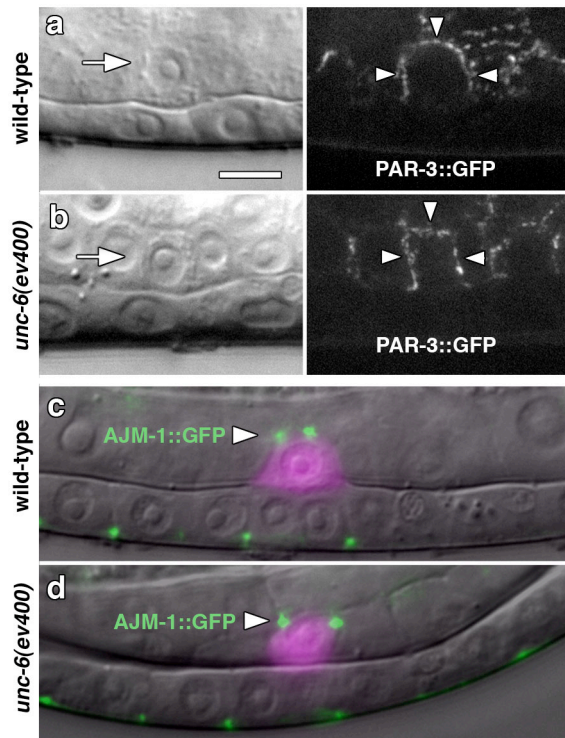

Figure S6

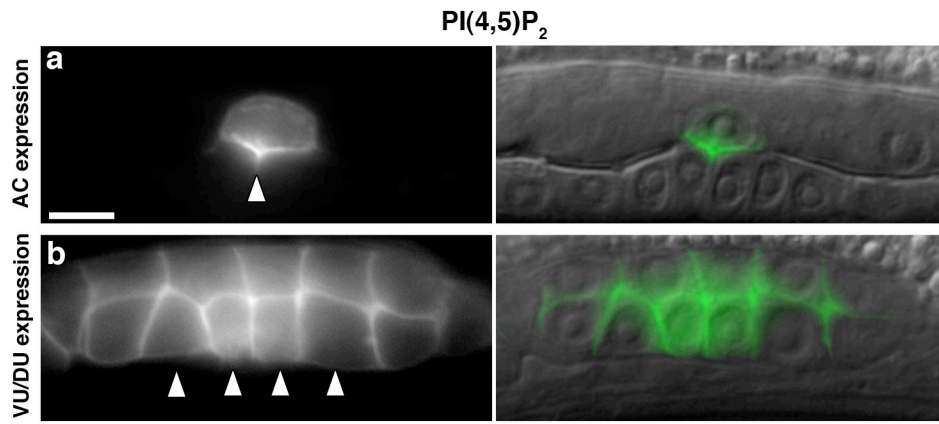

Figure S7

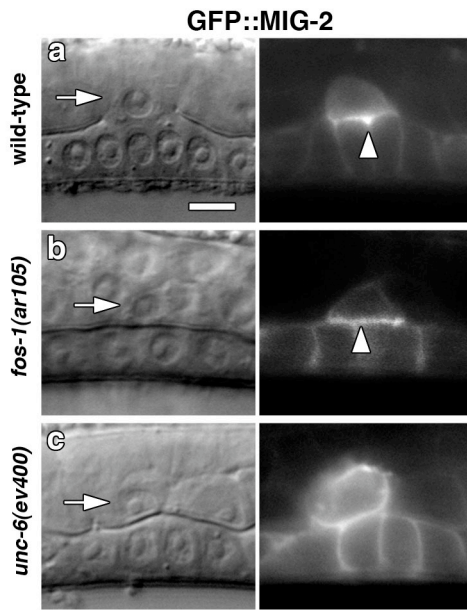

**Table S1. AC invasion in mutant strains with roles in cell motility and axon outgrowth**

| <i>C. elegans</i> gene     | Encoded Product                                                                                                                                    | Invasion at P6.p 4-cell stage (number of ACs invaded/number observed) <sup>a</sup> | Invasion at P6.p 8-cell stage (number of ACs invaded/number observed) |
|----------------------------|----------------------------------------------------------------------------------------------------------------------------------------------------|------------------------------------------------------------------------------------|-----------------------------------------------------------------------|
| <i>arf-1.2(ok796)</i>      | ADP-ribosylation factor 1 homolog                                                                                                                  | 10/10                                                                              | 10/10                                                                 |
| <i>arf-1.2(ok1322)</i>     | ADP-ribosylation factor 1 homolog                                                                                                                  | 9/9                                                                                | 4/4                                                                   |
| <i>bar-1(ga80)</i>         | Armadillo/beta-Catenin/plakoglobin                                                                                                                 | 11/11                                                                              | 9/9                                                                   |
| <i>C25F6.4(ok874)</i>      | protein tyrosine kinase homolog that is also homologous to human RS1                                                                               | 15/15                                                                              | 16/16                                                                 |
| <i>cam-1(gm122)</i>        | receptor tyrosine kinase of the immunoglobulin superfamily that is orthologous to human ROR1                                                       | 7/9                                                                                | 28/35                                                                 |
| <i>cam-2(gm124)</i>        | uncloned locus that affects migration of canal associated neurons                                                                                  | 6/6                                                                                | 5/5                                                                   |
| <i>cdh-4(ok1323)</i>       | member of the cadherin superfamily                                                                                                                 | 10/10                                                                              | 8/8                                                                   |
| <i>cdh-5(hc181)</i>        | member of the cadherin superfamily                                                                                                                 | 10/10                                                                              | 7/7                                                                   |
| <i>cdh-7(ok428)</i>        | contains a cadherin domain                                                                                                                         | 10/10                                                                              | not observed                                                          |
| <i>ced-2(e1752)</i>        | Src homology (SH) 2 and 3-containing adaptor protein                                                                                               | 10/10                                                                              | 11/11                                                                 |
| <i>ced-5(n1812)</i>        | homolog of the human protein DOCK180                                                                                                               | 10/10                                                                              | 13/13                                                                 |
| <i>ced-12(k149)</i>        | Regulator of Rac1, required for phagocytosis and cell migration                                                                                    | 11/11                                                                              | 12/12                                                                 |
| <i>ceh-10(ct78)</i>        | Paired-like class of homeodomain proteins                                                                                                          | 10/10                                                                              | 8/8                                                                   |
| <i>ces-1(n1414)</i>        | C2H2-type zinc finger transcription factor that is a member of the Snail family of proteins                                                        | 11/11                                                                              | 11/11                                                                 |
| <i>ces-1(n703)</i>         | C2H2-type zinc finger transcription factor that is a member of the Snail family of proteins                                                        | 16/16                                                                              | 14/14                                                                 |
| <i>cle-1(cg120)</i>        | collagen protein with endostatin domain                                                                                                            | 9/9                                                                                | 13/13                                                                 |
| <i>crb-1(ok931)</i>        | homolog of <i>Drosophila</i> CRUMBS                                                                                                                | 9/9                                                                                | 9/9                                                                   |
| <i>daf-1(m40)</i>          | TGF-beta type I receptor homolog                                                                                                                   | 8/9                                                                                | 6/6                                                                   |
| <i>daf-4(e1364)</i>        | type II transforming growth factor-beta (TGF-b) receptors                                                                                          | 11/11                                                                              | 14/14                                                                 |
| <i>daf-7(e1372)</i>        | member of the transforming growth factor beta (TGFbeta) superfamily                                                                                | 12/12                                                                              | 14/14                                                                 |
| <i>dgn-2(ok209)</i>        | dystroglycan                                                                                                                                       | 27/27                                                                              | 20/20                                                                 |
| <i>dbl-1(wk70)</i>         | member of the transforming growth factor beta (TGFbeta) superfamily                                                                                | 21/21                                                                              | 6/6                                                                   |
| <i>dpy-19(e1295)</i>       | novel transmembrane protein                                                                                                                        | 7/7                                                                                | 7/7                                                                   |
| <i>efn-4(bx80)</i>         | member of the ephrin family of ligands                                                                                                             | 10/10                                                                              | 17/17                                                                 |
| <i>egl-15(MT3324)</i>      | FGF-like receptor tyrosine kinase                                                                                                                  | 13/13                                                                              | 7/7                                                                   |
| <i>egl-17(e1313)</i>       | fibroblast growth factor-like protein                                                                                                              | 13/13                                                                              | 8/8                                                                   |
| <i>evl-20(ar103)</i>       | a functional ortholog of human ADP-ribosylation factor-like protein 2                                                                              | not observed                                                                       | 4/4                                                                   |
| <i>F11D5.3(ok574)</i>      | a putative tyrosine kinase homologous to human RS1                                                                                                 | 11/11                                                                              | 22/22                                                                 |
| <i>flt-1(ok722)</i>        | a putative homolog of flectin, an extracellular matrix protein                                                                                     | 10/10                                                                              | 8/8                                                                   |
| <i>gon-1(e1254)/eDf18</i>  | a functional metalloprotease that defines a new sub-family of secreted proteases known as MPT (metalloprotease with thrombospondin type 1 repeats) | 8/8                                                                                | 11/11                                                                 |
| <i>gpn-1(ok377)</i>        | glypican, a heparan sulfate proteoglycan anchored to the cell membrane by a GPI linkage                                                            | 13/13                                                                              | 14/14                                                                 |
| <i>hlh-8(nr2061)</i>       | helix-loop-helix protein required for normal muscle development                                                                                    | 10/10                                                                              | 18/18                                                                 |
| <i>lad-1(ok1244)/sax-7</i> | ortholog of human L1CAM                                                                                                                            | 10/10                                                                              | 13/13                                                                 |
| <i>let-756(S2613)</i>      | fibroblast growth factor (FGF)-like ligand                                                                                                         | 9/11                                                                               | 21/21                                                                 |
| <i>lon-2(e678)</i>         | member of the glypican family of heparan sulfate proteoglycans                                                                                     | 13/13                                                                              | 19/19                                                                 |
| <i>mab-20(ev574)</i>       | semaphorin                                                                                                                                         | 9/10                                                                               | 13/13                                                                 |
| <i>mab-20(bx24)</i>        | semaphorin                                                                                                                                         | 10/10                                                                              | 10/10                                                                 |
| <i>max-1(ju39)</i>         | conserved PH/MyTH4/FERM domain-containing protein                                                                                                  | 15/15                                                                              | 10/10                                                                 |
| <i>mig-1(e1787)</i>        | Frizzled-like receptor                                                                                                                             | 10/10                                                                              | 13/13                                                                 |
| <i>mig-2(gm103)</i>        | Rho family of GTP-binding proteins, similar to Rac                                                                                                 | 12/15                                                                              | 36/37                                                                 |
| <i>mig-6(e1931)</i>        | uncloned locus involved in cell migration                                                                                                          | 9/10                                                                               | 15/15                                                                 |
| <i>mig-14(ga62)</i>        | homologous to <i>drosophila</i> Wntless                                                                                                            | 10/10                                                                              | 15/15                                                                 |
| <i>mig-15(rh326)</i>       | Nck-interacting kinase (NIK)                                                                                                                       | 8/9                                                                                | 10/10                                                                 |

|                       |                                                                                                                     |              |         |
|-----------------------|---------------------------------------------------------------------------------------------------------------------|--------------|---------|
| <i>mig-17(k113)</i>   | secreted metalloprotease that is a member of the ADAM (A Disintegrin And Metalloprotease) protein family            | 10/10        | 13/13   |
| <i>mom-2(or42)</i>    | member of the Wnt family of secreted signaling glycoproteins                                                        | 6/6          | 20/20   |
| <i>mom-5(or57)</i>    | Frizzled-like receptor                                                                                              | 2/5          | 7/8     |
| <i>pkc-3(RNAi)</i>    | Serine/threonine protein kinase, atypical Protein Kinase C                                                          | 15/15        | no data |
| <i>pld-1(ok986)</i>   | phospholipase D1                                                                                                    | 10/10        | 2/2     |
| <i>plx-1(nc37)</i>    | plexin ortholog, semaphorin receptor                                                                                | 10/10        | 10/10   |
| <i>ptp-3(op147)</i>   | receptor-like tyrosine phosphatase                                                                                  | 10/10        | 15/15   |
| <i>qid-7(mu533)</i>   | uncloned locus that affects Q neuroblast polarization and migration                                                 | 11/11        | 10/10   |
| <i>qid-8(mu342)</i>   | uncloned locus that affects Q neuroblast polarization and migration                                                 | 10/10        | 13/15   |
| <i>rac-2(ok326)</i>   | Rho family GTPase that is one of three C. elegans Rac-related proteins                                              | 10/10        | 7/7     |
| <i>rig-4(ok1160)</i>  | Immunoglobulin C-2 Type/fibronectin type III domains                                                                | 10/10        | 5/5     |
| <i>sax-3(ky123)</i>   | homologous to Drosophila roundabout                                                                                 | 11/11        | 10/10   |
| <i>sdn-1(ok449)</i>   | a type I transmembrane heparan sulfate proteoglycan, syndecan                                                       | 13/13        | 5/5     |
| <i>slt-1(eh15)</i>    | homolog of Drosophila slit                                                                                          | 16/16        | 11/11   |
| <i>slt-1(ok255)</i>   | homolog of Drosophila slit                                                                                          | 80/81        | 59/59   |
| <i>sma-6(wk7)</i>     | serine/threonine protein kinase that is orthologous to type I TGF-beta receptors                                    | 10/10        | 15/15   |
| <i>smp-1(ev715)</i>   | semaphorin                                                                                                          | 10/11        | 12/12   |
| <i>smp-2(ev709)</i>   | semaphorin                                                                                                          | 10/10        | 10/10   |
| <i>syg-1(ky652)</i>   | a novel transmembrane protein                                                                                       | 9/9          | 12/12   |
| <i>syg-2(ky671)</i>   | transmembrane protein, immunoglobulin superfamily                                                                   | 10/10        | 4/4     |
| <i>tag-150(gk261)</i> | Guanine nucleotide exchange factor for Rho and Rac GTPases                                                          | 10/10        | 11/11   |
| <i>unc-3(e151)</i>    | a protein with homology to immunoglobulin (Ig) domain-containing transcription factors                              | 10/10        | 10/10   |
| <i>unc-5(e53)</i>     | a netrin receptor required for dorsal cell and axon migration                                                       | 10/10        | 22/22   |
| <i>unc-6(ev400)</i>   | netrin ortholog, secreted guidance molecule that regulates pioneer axons and mesodermal cells                       | 4/20         | 14/18   |
| <i>unc-14(e57)</i>    | an activity required for both axonogenesis and sex myoblast migration                                               | 8/10         | 11/11   |
| <i>unc-18(e81)</i>    | an ortholog of Saccharomyces cerevisiae SEC1                                                                        | 10/11        | 12/12   |
| <i>unc-30(e191)</i>   | Pitx homeodomain transcription factor family member                                                                 | 10/10        | 10/10   |
| <i>unc-33(mn407)</i>  | CRMP/TOAD/Ulip/DRP homologue                                                                                        | 10/10        | 10/11   |
| <i>unc-34(e315)</i>   | EVH1 domain-containing protein that is the sole C. elegans Enabled/VASP homologue                                   | 6/10         | 12/12   |
| <i>unc-34(e566)</i>   | EVH1 domain-containing protein that is the sole C. elegans Enabled/VASP homologue                                   | 5/8          | 5/5     |
| <i>unc-39(e257)</i>   | homeodomain transcription factor that belongs to the Six4/5 family                                                  | 10/10        | 11/11   |
| <i>unc-40(e271)</i>   | A netrin receptor required for guiding dorsal and ventral cell and axon migrations                                  | 6/21         | 13/18   |
| <i>unc-44(e1197)</i>  | ankyrin-like protein                                                                                                | 10/10        | 10/10   |
| <i>unc-44(e362)</i>   | ankyrin-like protein                                                                                                | 10/10        | 2/2     |
| <i>unc-51(e369)</i>   | serine/threonine kinase involved in autophagy                                                                       | 9/10         | 13/13   |
| <i>unc-51(e1189)</i>  | serine/threonine kinase involved in autophagy                                                                       | 10/12        | 10/10   |
| <i>unc-53(e404)</i>   | orthologous to human NAV1, NAV2/RAINB1, and NAV3                                                                    | 11/11        | 7/7     |
| <i>unc-53(n152)</i>   | orthologous to human NAV1, NAV2/RAINB1, and NAV3                                                                    | 10/10        | 13/13   |
| <i>unc-60(e723)</i>   | orthologs of actin depolymerizing factor/cofilin                                                                    | 15/15        | 16/16   |
| <i>unc-60(su158)</i>  | orthologs of actin depolymerizing factor/cofilin                                                                    | 37/39        | 30/30   |
| <i>unc-71(e541)</i>   | ADAM, a disintegrin and metalloprotease-containing transmembrane protein                                            | 10/10        | 10/10   |
| <i>unc-73(e936)</i>   | guanine nucleotide exchange factor (GNEF) similar to the trio protein                                               | not observed | 39/39   |
| <i>unc-73(gm40)</i>   | guanine nucleotide exchange factor (GNEF) similar to the trio protein                                               | 6/11         | 22/22   |
| <i>unc-76(e911)</i>   | coiled-coil protein that belongs to the FEZ (fasciculation and elongation protein; zygin/zeta-1) family of proteins | 9/11         | 10/10   |
| <i>unc-78(gk27)</i>   | homolog of actin-interacting protein 1                                                                              | 26/26        | 27/27   |
| <i>unc-97(su10)</i>   | LIM domain-containing protein of the PINCH family                                                                   | 10/10        | 14/14   |
| <i>unc-115(e2225)</i> | Actin-binding LIM Zn-finger protein Limatin involved in axon guidance                                               | 10/10        | 15/15   |
| <i>unc-115(ky275)</i> | Actin-binding LIM Zn-finger protein Limatin involved in axon guidance                                               | 67/67        | 68/68   |
| <i>unc-115(mn481)</i> | Actin-binding LIM Zn-finger protein Limatin                                                                         | 8/11         | 24/24   |

|                       |                                                                                          |       |       |
|-----------------------|------------------------------------------------------------------------------------------|-------|-------|
| <i>unc-129(ev554)</i> | member of the transforming growth factor beta (TGFbeta) superfamily                      | 5/5   | 11/11 |
| <i>vab-1(e2)</i>      | ephrin receptor                                                                          | 10/10 | 10/10 |
| <i>vab-8(e1017)</i>   | novel protein containing an atypical kinesin-like motor domain                           | 10/10 | 10/10 |
| <i>vab-9(e1744)</i>   | claudin homolog                                                                          | 8/9   | 13/13 |
| <i>ver-1(ok859)</i>   | Fibroblast/platelet-derived growth factor receptor and related receptor tyrosine kinases | 10/10 | 4/4   |
| <i>ver-2(ok897)</i>   | Fibroblast/platelet-derived growth factor receptor and related receptor tyrosine kinases | 10/10 | 8/8   |
| <i>ver-3(gk227)</i>   | Fibroblast/platelet-derived growth factor receptor and related receptor tyrosine kinases | 11/11 | 13/13 |
| <i>ver-4(ok1079)</i>  | Fibroblast/platelet-derived growth factor receptor and related receptor tyrosine kinases | 10/10 | 5/5   |
| <i>zig-1(ok784)</i>   | secreted 2-immunoglobulin-domain protein                                                 | 9/9   | 5/5   |
| <i>zig-2(ok696)</i>   | secreted 2-immunoglobulin-domain protein                                                 | 9/9   | 11/11 |
| <i>zig-3(gk33)</i>    | secreted 2-immunoglobulin-domain protein                                                 | 10/10 | 4/4   |
| <i>zig-4(gk4)</i>     | secreted 2-immunoglobulin-domain protein                                                 | 10/10 | 4/4   |
| <i>zig-5(ok1065)</i>  | secreted 2-immunoglobulin-domain protein                                                 | 11/11 | 10/10 |
| <i>zig-6(ok723)</i>   | secreted 2-immunoglobulin-domain protein                                                 | 10/10 | 3/3   |
| <i>zig-8(ok561)</i>   | secreted 2-immunoglobulin-domain protein                                                 | 9/9   | 4/4   |

<sup>a</sup> ACs showing any degree of invasion were scored as invaded and invasion was scored over the entire range of the 4-cell stage, including the L3 molt. In contrast, Table S2 4-cell stage animals were only scored at beginning of the 4-cell stage at the mid-to-late L3 stage, and partial invasions were scored.

**Table S2. Timing and degree of AC invasion into the vulval epithelium**

| Genotype/Treatment                                                             | ACs showing full, partial or no invasion |                    |               |      |                                    |                    |                  |      |
|--------------------------------------------------------------------------------|------------------------------------------|--------------------|---------------|------|------------------------------------|--------------------|------------------|------|
|                                                                                | P6.p 4-cell stage (mid-to-late L3 stage) |                    |               |      | P6.p 8-cell stage (early L4 stage) |                    |                  |      |
|                                                                                | % Full Invasion                          | % Partial Invasion | % No Invasion | n =  | % Full Invasion                    | % Partial Invasion | % No Invasion    | n =  |
| wild-type (N2)                                                                 | 100                                      | 0                  | 0             | >100 | 100                                | 0                  | 0                | >100 |
| <u>unc-6/site of action</u>                                                    |                                          |                    |               |      |                                    |                    |                  |      |
| <i>unc-6(ev400)</i>                                                            | 0                                        | 26                 | 74            | 54   | 52                                 | 26                 | 22 <sup>h</sup>  | 54   |
| <i>ghIs8[unc-6&gt;Venus::unc-6]; unc-6(ev400)<sup>d</sup></i>                  | 91                                       | 4                  | 5             | 55   | 100                                | 0                  | 0                | 53   |
| <i>unc-6(ev400); ghEx15[glr-1p&gt;Venus::unc-6; tph-1p&gt;GFP]<sup>b</sup></i> | 90                                       | 4                  | 6             | 50   | 96                                 | 4                  | 0                | 50   |
| <i>unc-6(ev400); ghEx13[egl-17&gt;Venus::unc-6]<sup>c</sup></i>                | 8                                        | 22                 | 70            | 50   | 60                                 | 16                 | 25               | 58   |
| <i>rde-1(ne219); ghEx11[egl-17&gt;rde1::mRFP]; unc-6(RNAi)<sup>d</sup></i>     | 100                                      | 0                  | 0             | 51   | 100                                | 0                  | 0                | 34   |
| <i>lin-3(n1059)/lin-3(n378) (Vul)<sup>e</sup></i>                              | 21                                       | 0                  | 79            | 52   | 19                                 | 0                  | 81 <sup>i</sup>  | 52   |
| <i>lin-3(n1059)/lin-3(n378); unc-6(ev400)</i>                                  | 0                                        | 0                  | 100           | 50   | 0                                  | 0                  | 100 <sup>j</sup> | 50   |
| <i>laser killed P3.p-P8.p(Vul); unc-6(ev400)</i>                               | 0                                        | 0                  | 100           | 20   | 0                                  | 0                  | 100 <sup>k</sup> | 20   |
| <i>kyIs299 [hs&gt;unc-6::HA]<sup>f</sup></i>                                   | 50                                       | 26                 | 24            | 50   | nd                                 | nd                 | nd               | nd   |
| <i>N2(mock heat shock)</i>                                                     | 98                                       | 2                  | 0             | 51   | nd                                 | nd                 | nd               | nd   |
| <u>Netrin receptors/unc-40/site of action</u>                                  |                                          |                    |               |      |                                    |                    |                  |      |
| <i>unc-40(e271)</i>                                                            | 2                                        | 31                 | 67            | 54   | 58                                 | 25                 | 17 <sup>l</sup>  | 53   |
| <i>unc-40(e271); unc-6(ev400)</i>                                              | 2                                        | 29                 | 69            | 51   | 57                                 | 21                 | 21 <sup>m</sup>  | 70   |
| <i>unc-40(e271); qyIs66[cdh-3&gt;unc-40::gfp]</i>                              | 96                                       | 2                  | 2             | 54   | 98                                 | 2                  | 0                | 53   |
| <i>unc-5(e51)</i>                                                              | 100                                      | 0                  | 0             | 58   | 100                                | 0                  | 0                | 64   |
| <u>Intracellular effectors</u>                                                 |                                          |                    |               |      |                                    |                    |                  |      |
| <i>mig-10(ct41)</i>                                                            | 100                                      | 0                  | 0             | 59   | 100                                | 0                  | 0                | 81   |
| <i>ced-10(n1993)</i>                                                           | 98                                       | 2                  | 0             | 61   | 100                                | 0                  | 0                | 57   |
| <i>mig-2(mu28)</i>                                                             | 100                                      | 0                  | 0             | 54   | 100                                | 0                  | 0                | 64   |
| <i>ced-10(n1993); mig-2(mu28)</i>                                              | 24                                       | 10                 | 66            | 29   | 69                                 | 5                  | 25               | 55   |
| <i>unc-34(gm104)</i>                                                           | 64                                       | 16                 | 20            | 50   | 100                                | 0                  | 0                | 50   |
| <i>qyIs23[cdh-3&gt;mCherry::PLC<math>\delta^{PH}</math>]<sup>g</sup></i>       | 85                                       | 13                 | 2             | 55   | 100                                | 0                  | 0                | 50   |
| <i>qyIs23[cdh-3&gt;mCherry::PLC<math>\delta^{PH}</math>]; mig-2(mu28)</i>      |                                          | 18                 | 12            | 114  | 99                                 | 1                  | 0                | 110  |
| <i>qyIs23[cdh-3&gt;mCherry::PLC<math>\delta^{PH}</math>]; unc-34(gm104)</i>    | 41                                       | 18                 | 41            | 51   | 89                                 | 9                  | 2                | 56   |
| <u><i>fos-1</i> pathway interaction</u>                                        |                                          |                    |               |      |                                    |                    |                  |      |
| <i>unc-40(e271); rrf-3(pk1426)</i>                                             | 8                                        | 27                 | 65            | 51   | 50                                 | 22                 | 28               | 50   |
| <i>unc-40(e271); rrf-3(pk1426); fos-1(RNAi)</i>                                | 4                                        | 11                 | 85            | 54   | 12                                 | 12                 | 77               | 52   |
| <i>rrf-3(pk1426); fos-1(RNAi)</i>                                              | 10                                       | 8                  | 82            | 50   | 16                                 | 26                 | 58               | 50   |

<sup>a</sup> Venus::unc-6 driven by its own promoter. <sup>11</sup>

<sup>b</sup> Ventral nerve cord specific expression of Venus::unc-6 driven by *glr-1* promoter. <sup>11</sup>

<sup>c</sup> 1° VPC specific expression of Venus::unc-6 driven by the *egl-17* promoter. <sup>11</sup>

<sup>d</sup> Targeted RNAi mediated knockdown of *unc-6* in the 1° VPCs. <sup>11</sup>

<sup>e</sup> A similar percentage of ACs have been shown to invade when vulval cells are removed by ablation. <sup>5</sup>

<sup>f</sup> 2h heat shock at 30°C followed by 4h recovery at 15°C.

<sup>g</sup> *qyIs23[cdh-3>mCherry::PLC $\delta^{PH}$ ]* binds and sequesters PI(4,5)P<sub>2</sub> in the AC, thus reducing its levels there.

<sup>h-m</sup> The number of AC's that detached from the basement membrane at the L4 stage was as follows (number of detached/number that failed to invade): h = 2/12; i = 11/42; j = 47/50; k = 18/20 l = 0/9; m = 2/15.

nd = not determined

**Table S3. Polarized marker localization in wild-type and mutant ACs**

| Genotype                           | Marker                     | Classification of marker localization patterns in wild-type and various mutant ACs |                                  |                    |    |                   |                                  |                    |    |                   |                                  |                    |    |
|------------------------------------|----------------------------|------------------------------------------------------------------------------------|----------------------------------|--------------------|----|-------------------|----------------------------------|--------------------|----|-------------------|----------------------------------|--------------------|----|
|                                    |                            | P6.p 1-cell stage                                                                  |                                  |                    |    | P6.p 2-cell stage |                                  |                    |    | P6.p 4-cell stage |                                  |                    |    |
|                                    |                            | Polarized (%±SE)                                                                   | Apicolateral Accumulation (%±SE) | No Polarity (%±SE) | N= | Polarized (%±SE)  | Apicolateral Accumulation (%±SE) | No Polarity (%±SE) | N= | Polarized (%±SE)  | Apicolateral Accumulation (%±SE) | No Polarity (%±SE) | N= |
| wild-type                          | mCherry::PLC $\delta^{PH}$ | 85±8                                                                               | 15±8                             | 0                  | 20 | 86±8              | 14±8                             | 0                  | 21 | 95±5              | 0                                | 5±5                | 20 |
| wild-type                          | GFP::MIG-2                 | 86±7                                                                               | 13±7                             | 0                  | 22 | 100               | 0                                | 0                  | 22 | 100               | 0                                | 0                  | 23 |
| wild-type                          | mCherry::moeABD            | 100                                                                                | 0                                | 0                  | 18 | 100               | 0                                | 0                  | 21 | 95±5              | 5±5                              | 0                  | 21 |
| wild-type                          | UNC-40::GFP                | 90±7                                                                               | 5±5                              | 5±5                | 20 | 100               | 0                                | 0                  | 21 | 90±6              | 10±6                             | 0                  | 20 |
| <i>unc-6(ev400)</i>                | mCherry::PLC $\delta^{PH}$ | 22±10                                                                              | 38±12                            | 38±12              | 18 | 15±9              | 53±12                            | 32±11              | 19 | 0                 | 69±12                            | 31±12              | 16 |
| <i>unc-6(ev400)</i>                | mCherry::moeABD            | 29±11                                                                              | 53±12                            | 18±10              | 17 | 29±11             | 71±11                            | 0                  | 17 | 18±10             | 76±11                            | 6±6                | 17 |
| <i>unc-6(ev400)</i>                | UNC-40::GFP                | 21±10                                                                              | 32±11                            | 47±12              | 19 | 5±5               | 42±12                            | 53±12              | 20 | 0                 | 25±10                            | 75±10              | 20 |
| <i>unc-6(ev400)</i>                | GFP::MIG-2                 | 33±11                                                                              | 38±11                            | 29±10              | 21 | 14±8              | 43±11                            | 43±11              | 21 | 25±10             | 40±11                            | 35±11              | 20 |
| Vul <sup>a</sup>                   | mCherry::PLC $\delta^{PH}$ | 84±9                                                                               | 16±9                             | 0                  | 19 | 90±7              | 10±7                             | 0                  | 20 | 73±12             | 27±12                            | 0                  | 15 |
| Vul <sup>a</sup>                   | UNC-40::GFP                | 94±6                                                                               | 6±6                              | 0                  | 17 | 86±8              | 14±8                             | 0                  | 21 | 94±6              | 6±6                              | 0                  | 17 |
| Vul <sup>a</sup>                   | GFP::MIG-2                 | 95±5                                                                               | 5±5                              | 0                  | 20 | 87±7              | 13±7                             | 0                  | 23 | 76±10             | 24±10                            | 0                  | 21 |
| Vul <sup>a</sup>                   | mCherry::moeABD            | 88±9                                                                               | 6±6                              | 6±6                | 16 | 86±8              | 14±7                             | 0                  | 21 | 90±7              | 10±6                             | 0                  | 20 |
| <i>hs&gt;unc-6::HA<sup>b</sup></i> | UNC-40::GFP                | nd                                                                                 | nd                               | nd                 | nd | nd                | nd                               | nd                 | nd | 33±13             | 33±13                            | 33±13              | 15 |
| wild-type (mock) <sup>c</sup>      | UNC-40::GFP                | nd                                                                                 | nd                               | nd                 | nd | nd                | nd                               | nd                 | nd | 93±7              | 7±7                              | 0                  | 15 |

<sup>a</sup> Vul (vulvaless) animals were of the genotype *lin-3(n1059)/lin-3(n378)*.

<sup>b</sup> Heat shock directed expression of *unc-6::HA* from the integrated transgene *kyIs299*, 2h heat shock at 30°C followed by 4h recovery at 15°C.

<sup>c</sup> wild-type animals expressing UNC-40::GFP in the AC were subjected to an identical experimental regimen to confirm that heat shock alone does not cause defects in UNC-40::GFP localization.



**Table S4. Primer sequences and templates used for PCR fusions**

| Primer Sequence                                                                        | Primer Type                              | Amplicon                          | Template                                                             |
|----------------------------------------------------------------------------------------|------------------------------------------|-----------------------------------|----------------------------------------------------------------------|
| 5' TAA TgT gAg TTA gCT CAC TCA TTA gg 3'                                               | forward                                  | <i>cdh-3/zmp-1</i> > promoters    | <i>cdh-3</i> >, pPD107.94/mk62-63; <i>zmp-1</i> >, pPD107.94/mk50-51 |
| 5' AAC gAT ggA TAC gCT AAC AAC TTg g 3'                                                | forward nested                           | <i>cdh-3/zmp-1</i> > promoters    | <i>cdh-3</i> >, pPD107.94/mk62-63; <i>zmp-1</i> >, pPD107.94/mk50-51 |
| 5' TTT CTg AgC TCg gTA CCC TCC AAg 3'                                                  | reverse                                  | <i>cdh-3/zmp-1</i> > promoters    | <i>cdh-3</i> >, pPD107.94/mk62-63; <i>zmp-1</i> >, pPD107.94/mk50-51 |
| 5' TAG gCT TTT CCg TAT AgC ATC CTC 3'                                                  | forward                                  | <i>fos-1a</i> > promoter          | cosmid F29G9                                                         |
| 5' gCC CAA CTC TAg TCA TTT CTA gC 3'                                                   | forward nested                           | <i>fos-1a</i> > promoter          | cosmid F29G9                                                         |
| 5' TCC ACT CTC TTA TAT AgC AgA ggT gC 3'                                               | reverse                                  | <i>fos-1a</i> > promoter          | cosmid F29G9                                                         |
| 5' CTT ggA ggg TAC CgA gCT Cag AAA ggT ACC Atg AgT AAA ggA gAA g 3'                    | <i>cdh-3/zmp-1</i> extension, forward    | <i>GFP::unc-34</i>                | <i>punc-86</i> > <i>GFP::unc-34</i>                                  |
| 5' Cgg gAA gCT AgA gTA AgT AgT TCg CC 3'                                               | reverse                                  | <i>GFP::unc-34</i>                | <i>punc-86</i> > <i>GFP::unc-34</i>                                  |
| 5' CTC TCA Agg ATC TTA CCg CTg TTg 3'                                                  | reverse nested                           | <i>GFP::unc-34</i>                | <i>punc-86</i> > <i>GFP::unc-34</i>                                  |
| 5' CTT ggA ggg TAC CgA gCT Cag AAA ATg ATT TTg CgA CAT TTC gg 3'                       | <i>cdh-3/zmp-1</i> extension, forward    | <i>unc-40::GFP</i>                | <i>punc-86</i> > <i>unc-40::GFP</i>                                  |
| 5' gTg CCA CCT gAC gTC TAA g 3'                                                        | reverse                                  | <i>unc-40::GFP</i>                | <i>punc-86</i> > <i>unc-40::GFP</i>                                  |
| 5' gTA Cgg CCg ACT AgT Agg AAA CAg T 3'                                                | reverse nested                           | <i>unc-40::GFP</i>                | <i>punc-86</i> > <i>unc-40::GFP</i>                                  |
| 5' CTT ggA ggg TAC CgA gCT Cag AAA ATg gTC TCA AAg ggT gAA g 3'                        | <i>cdh-3/zmp-1</i> extension, forward    | <i>mCherry::moeABD</i>            | pJWZ6                                                                |
| 5' CAg gAA ACA gCT ATg ACC ATg 3'                                                      | reverse                                  | <i>mCherry::moeABD</i>            | pJWZ6                                                                |
| 5' gCC gCT CTA gAA TCA TCg TTC 3'                                                      | reverse nested                           | <i>mCherry::moeABD</i>            | pJWZ6                                                                |
| 5' CTT ggA ggg TAC CgA gCT Cag AAA ATg gCT CAA ACA AAg CCg ATT gCC 3'                  | <i>cdh-3/zmp-1</i> extension, forward    | <i>mCherry::PLCδ<sup>PH</sup></i> | pAA173                                                               |
| 5' TTC gAg CgA Agg TCg CTT TTT ggT C 3'                                                | reverse                                  | <i>mCherry::PLCδ<sup>PH</sup></i> | pAA173                                                               |
| 5' TTg AAA TCg AgT TgC AAg CgC gCT CC 3'                                               | reverse nested                           | <i>mCherry::PLCδ<sup>PH</sup></i> | pAA173                                                               |
| 5' CTT ggA ggg TAC CgA gCT Cag AAA ATg gCT CAA ACA AAg CCg ATT gCC 3'                  | <i>cdh-3/zmp-1</i> extension, forward    | <i>mCherry</i>                    | pAA64                                                                |
| 5' TTC gAg CgA Agg TCg CTT TTT ggT C 3'                                                | reverse                                  | <i>mCherry</i>                    | pAA64                                                                |
| 5' TTg AAA TCg AgT TgC AAg CgC gCT CC 3'                                               | reverse nested                           | <i>mCherry</i>                    | pAA64                                                                |
| 5' gCA CCT CTg CTA TAT AAg AgA gTg gAA Tgg CTC AAA CAA AgC CgA TTg CC 3'               | <i>fos-1a</i> extension, forward         | <i>mCherry::PLCδ<sup>PH</sup></i> | pAA173                                                               |
| 5' TTC gAg CgA Agg TCg CTT TTT ggT C 3'                                                | reverse                                  | <i>mCherry::PLCδ<sup>PH</sup></i> | pAA173                                                               |
| 5' TTg AAA TCg AgT TgC AAg CgC gCT CC 3'                                               | reverse nested                           | <i>mCherry::PLCδ<sup>PH</sup></i> | pAA173                                                               |
| 5' TgT AAA ACg ACg gCC AgT 3'                                                          | forward                                  | <i>unc-6</i> > promoter           | <i>pVns-unc-6</i>                                                    |
| 5' TgT AAA ACg ACg gCC AgT 3'                                                          | forward nested                           | <i>unc-6</i> > promoter           | <i>pVns-unc-6</i>                                                    |
| 5' gTT CTT CTC CTT TAC TgT TTg TgT gAA Agg gTg Taa AgT ggA 3'                          | reverse                                  | <i>unc-6</i> > promoter           | <i>pVns-unc-6</i>                                                    |
| 5' TCC ACT TTA CAC CCT TTC ACA CAA ACA TgA gTA AAg gAg AAg gAg AAg AACTTT TCA CTg g 3' | <i>unc-6</i> promoter extension, forward | <i>venus::unc-6(ΔSP)</i>          | <i>pVns-unc-6</i>                                                    |
| 5' CAg gAA ACA gCT ATg ACC ATg 3'                                                      | reverse                                  | <i>venus::unc-6(ΔSP)</i>          | <i>pVns-unc-6</i>                                                    |
| 5' ATg ACC ATg ATT ACg CCA AgC gC 3'                                                   | reverse nested                           | <i>venus::unc-6(ΔSP)</i>          | <i>pVns-unc-6</i>                                                    |

**Table S5. Extrachromosomal array and integrated strain generation**

| <b><i>Ex</i><br/>Designation</b> | <b><i>Is</i><br/>Designation</b>      | <b>PCR Fusion created</b>                   | <b>Injected<br/>Concentration</b> | <b>Co-Injection<br/>Marker(s)</b> |
|----------------------------------|---------------------------------------|---------------------------------------------|-----------------------------------|-----------------------------------|
| <i>qyEx27</i>                    | <i>qyIs23,<br/>qyIs24,<br/>qyIs25</i> | <i>cdh-3&gt;mCherry::PLCδ<sup>PH</sup></i>  | 0.01ng/μl                         | <i>unc-119</i>                    |
| <i>qyEx39</i>                    | <i>qyIs50</i>                         | <i>cdh-3&gt;mCherry::moeABD</i>             | 2ng/μl                            | <i>unc-119</i>                    |
| <i>qyEx40</i>                    | <i>qyIs66,<br/>qyIs67</i>             | <i>cdh-3&gt;unc-40::GFP</i>                 | 2ng/μl                            | <i>unc-119 +<br/>myo-2&gt;YFP</i> |
| <i>qyEx30</i>                    | <i>qyIs37</i>                         | <i>zmp-1&gt;unc-40::GFP</i>                 | 2ng/μl                            | <i>unc-119</i>                    |
| <i>qyEx42</i>                    | <i>qyIs61</i>                         | <i>cdh-3&gt;unc-34::GFP</i>                 | 1ng/μl                            | <i>unc-119</i>                    |
| <i>qyEx60</i>                    | not integrated                        | <i>fos-1a&gt;mCherry::PLCδ<sup>PH</sup></i> | 0.25ng/μl                         | <i>pha-1</i>                      |
| <i>qyEx68</i>                    | <i>qyIs7</i>                          | <i>zmp-1&gt;mCherry</i>                     | 1.0ng/μl                          | <i>unc-119</i>                    |
| <i>qyEx3</i>                     | <i>qyIs17</i>                         | pGK41( <i>lam-1::GFP</i> )                  | 10ng/μl                           | <i>unc-119</i>                    |
| <i>qyEx19</i>                    | <i>qyIs27</i>                         | pPR80( <i>GFP::ced-10</i> )                 | 75ng/μl                           | <i>unc-119</i>                    |
| <i>qyEx78</i>                    | not integrated                        | <i>Venus::unc-6(ΔSP)</i>                    | 15ng/μl                           | <i>unc-119</i>                    |
